# Supplementary material for: Valdastillas: historia, vida y cultura popular : acercamiento histórico a la antigua campana de Ojalvo
Source: MDPI journal article supplement (doi:10.3390/md21120636), 1997-01-01
Supplement: s1 [file s1]

## Supplementary tables

**Table S1.** Effect of 5-FU on CRC cell lines (average % reduction in cell viability ( $\pm$ SD)). These are the data plotted in manuscript Figure 1.

| Cell line | Days | 0.5 $\mu$ M            | 1 $\mu$ M              | 2 $\mu$ M              | 4 $\mu$ M              | 8 $\mu$ M              | 16 $\mu$ M             | 32 $\mu$ M             | 64 $\mu$ M             |
|-----------|------|------------------------|------------------------|------------------------|------------------------|------------------------|------------------------|------------------------|------------------------|
| DLD-1     | 1    | 6.24<br>( $\pm$ 2.74)  | 6.96<br>( $\pm$ 2.28)  | 15.14<br>( $\pm$ 6.42) | 16.08<br>( $\pm$ 1.29) | 20.62<br>( $\pm$ 4.40) | 24.20<br>( $\pm$ 1.35) | 27.32<br>( $\pm$ 0.78) | 29.14<br>( $\pm$ 3.11) |
|           | 2    | 4.87<br>( $\pm$ 1.62)  | 13.02<br>( $\pm$ 1.70) | 23.46<br>( $\pm$ 2.42) | 35.96<br>( $\pm$ 2.42) | 45.85<br>( $\pm$ 2.45) | 53.13<br>( $\pm$ 2.43) | 57.06<br>( $\pm$ 2.68) | 59.39<br>( $\pm$ 3.30) |
|           | 3    | 5.27<br>( $\pm$ 1.91)  | 15.21<br>( $\pm$ 3.83) | 27.94<br>( $\pm$ 3.44) | 43.21<br>( $\pm$ 4.26) | 55.38<br>( $\pm$ 3.09) | 65.28<br>( $\pm$ 2.39) | 69.82<br>( $\pm$ 2.96) | 70.69<br>( $\pm$ 2.22) |
| LS411N    | 1    | 4.59<br>( $\pm$ 5.17)  | -1.33<br>( $\pm$ 8.06) | 3.01<br>( $\pm$ 9.38)  | 5.44<br>( $\pm$ 6.36)  | 4.08<br>( $\pm$ 10.50) | 12.43<br>( $\pm$ 8.69) | 10.91<br>( $\pm$ 7.40) | 16.52<br>( $\pm$ 8.12) |
|           | 2    | 2.52<br>( $\pm$ 0.35)  | 5.07<br>( $\pm$ 4.48)  | 14.61<br>( $\pm$ 3.72) | 24.39<br>( $\pm$ 2.80) | 35.09<br>( $\pm$ 3.69) | 45.17<br>( $\pm$ 4.48) | 49.57<br>( $\pm$ 3.87) | 51.71<br>( $\pm$ 5.49) |
|           | 3    | 4.84<br>( $\pm$ 1.57)  | 17.70<br>( $\pm$ 2.22) | 29.65<br>( $\pm$ 2.73) | 45.61<br>( $\pm$ 2.49) | 57.20<br>( $\pm$ 1.79) | 66.52<br>( $\pm$ 1.85) | 69.65<br>( $\pm$ 0.76) | 71.96<br>( $\pm$ 1.08) |
| HCT-8     | 1    | 1.83<br>( $\pm$ 2.42)  | 4.68<br>( $\pm$ 2.62)  | 7.54<br>( $\pm$ 3.14)  | 13.59<br>( $\pm$ 3.22) | 19.91<br>( $\pm$ 2.16) | 26.60<br>( $\pm$ 2.90) | 28.11<br>( $\pm$ 2.36) | 30.32<br>( $\pm$ 2.84) |
|           | 2    | 5.77<br>( $\pm$ 2.17)  | 10.67<br>( $\pm$ 2.18) | 20.36<br>( $\pm$ 0.67) | 32.30<br>( $\pm$ 2.29) | 45.24<br>( $\pm$ 3.37) | 54.31<br>( $\pm$ 2.42) | 60.87<br>( $\pm$ 2.87) | 64.85<br>( $\pm$ 2.21) |
|           | 3    | 3.13<br>( $\pm$ 1.05)  | 9.02<br>( $\pm$ 3.31)  | 22.89<br>( $\pm$ 3.02) | 42.05<br>( $\pm$ 3.14) | 58.45<br>( $\pm$ 1.93) | 66.55<br>( $\pm$ 1.29) | 71.44<br>( $\pm$ 1.37) | 74.11<br>( $\pm$ 1.62) |
| LS513     | 1    | 2.63<br>( $\pm$ 2.48)  | 7.22<br>( $\pm$ 1.55)  | 11.46<br>( $\pm$ 0.67) | 19.68<br>( $\pm$ 1.42) | 23.76<br>( $\pm$ 0.80) | 28.82<br>( $\pm$ 1.00) | 31.25<br>( $\pm$ 1.83) | 32.00<br>( $\pm$ 1.63) |
|           | 2    | 23.80<br>( $\pm$ 2.46) | 36.75<br>( $\pm$ 2.86) | 44.93<br>( $\pm$ 2.93) | 50.19<br>( $\pm$ 2.89) | 53.68<br>( $\pm$ 2.22) | 56.15<br>( $\pm$ 2.32) | 58.28<br>( $\pm$ 1.99) | 60.61<br>( $\pm$ 2.64) |
|           | 3    | 45.84<br>( $\pm$ 2.66) | 62.25<br>( $\pm$ 1.56) | 67.65<br>( $\pm$ 2.38) | 65.49<br>( $\pm$ 2.50) | 68.06<br>( $\pm$ 2.02) | 70.08<br>( $\pm$ 1.91) | 71.68<br>( $\pm$ 1.62) | 73.37<br>( $\pm$ 1.77) |
|           |      | 0.0156 $\mu$ M         | 0.0313 $\mu$ M         | 0.0625 $\mu$ M         | 0.125 $\mu$ M          | 0.25 $\mu$ M           | 0.5 $\mu$ M            | 1 $\mu$ M              | 2 $\mu$ M              |
| LS513     | 3    | -1.70<br>( $\pm$ 0.69) | 0.21<br>( $\pm$ 0.89)  | 4.43<br>( $\pm$ 1.27)  | 15.81<br>( $\pm$ 1.92) | 32.13<br>( $\pm$ 3.31) | 49.05<br>( $\pm$ 2.02) | 63.28<br>( $\pm$ 1.85) | 69.85<br>( $\pm$ 1.45) |

**Table S2.** Effect of OmeGo on CRC cell lines (average % reduction in cell viability ( $\pm$ SD)). These are the data plotted in manuscript Figure 2.

| Cell line | Days | 62.5 $\mu$ M           | 125 $\mu$ M            | 250 $\mu$ M            | 500 $\mu$ M             | 750 $\mu$ M            | 1000 $\mu$ M           | 1250 $\mu$ M           | 1500 $\mu$ M           |
|-----------|------|------------------------|------------------------|------------------------|-------------------------|------------------------|------------------------|------------------------|------------------------|
| DLD-1     | 1    | 3.66<br>( $\pm$ 6.06)  | 7.49<br>( $\pm$ 3.59)  | 20.10<br>( $\pm$ 5.73) | 49.34<br>( $\pm$ 3.19)  | 61.05<br>( $\pm$ 1.52) | 65.02<br>( $\pm$ 1.50) | 65.06<br>( $\pm$ 3.89) | 64.16<br>( $\pm$ 1.41) |
|           | 2    | -2.00<br>( $\pm$ 5.20) | 4.70<br>( $\pm$ 6.33)  | 25.59<br>( $\pm$ 8.32) | 65.31<br>( $\pm$ 4.01)  | 80.96<br>( $\pm$ 3.72) | 86.81<br>( $\pm$ 0.97) | 86.38<br>( $\pm$ 1.41) | 87.23<br>( $\pm$ 1.44) |
|           | 3    | -2.75<br>( $\pm$ 2.70) | -1.17<br>( $\pm$ 2.57) | 13.85<br>( $\pm$ 7.05) | 61.05<br>( $\pm$ 11.15) | 86.63<br>( $\pm$ 7.59) | 92.34<br>( $\pm$ 5.72) | 94.55<br>( $\pm$ 3.79) | 93.88<br>( $\pm$ 3.35) |
| LS411N    | 1    | 8.37<br>( $\pm$ 4.52)  | 8.64<br>( $\pm$ 3.67)  | 16.34<br>( $\pm$ 2.96) | 21.50<br>( $\pm$ 3.10)  | 24.06<br>( $\pm$ 1.45) | 24.91<br>( $\pm$ 2.36) | 25.60<br>( $\pm$ 3.38) | 22.87<br>( $\pm$ 3.19) |
|           | 2    | 4.82<br>( $\pm$ 3.99)  | 6.85<br>( $\pm$ 3.79)  | 9.59<br>( $\pm$ 4.96)  | 16.82<br>( $\pm$ 5.91)  | 20.89<br>( $\pm$ 5.90) | 23.44<br>( $\pm$ 7.14) | 26.25<br>( $\pm$ 7.38) | 26.18<br>( $\pm$ 8.95) |
|           | 3    | 1.88<br>( $\pm$ 1.96)  | 5.09<br>( $\pm$ 1.96)  | 7.74<br>( $\pm$ 1.91)  | 12.11<br>( $\pm$ 2.23)  | 15.90<br>( $\pm$ 3.15) | 19.01<br>( $\pm$ 2.71) | 20.71<br>( $\pm$ 4.87) | 20.47<br>( $\pm$ 3.48) |

|              |   |                  |                  |                  |                  |                  |                  |                  |                  |
|--------------|---|------------------|------------------|------------------|------------------|------------------|------------------|------------------|------------------|
| <b>HCT-8</b> | 1 | 1.67<br>(±3.03)  | 1.15<br>(±1.23)  | 0.62<br>(±3.56)  | 6.12<br>(±3.15)  | 11.21<br>(±4.55) | 11.78<br>(±4.74) | 12.86<br>(±4.40) | 14.02<br>(±3.83) |
|              | 2 | -3.39<br>(±2.02) | -5.21<br>(±3.59) | -2.28<br>(±6.18) | 5.23<br>(±8.26)  | 13.52<br>(±8.35) | 21.35<br>(±7.55) | 23.67<br>(±8.69) | 24.34<br>(±7.66) |
|              | 3 | -1.02<br>(±0.67) | -1.25<br>(±0.54) | 0.08<br>(±1.51)  | 2.32<br>(±1.44)  | 6.58<br>(±1.41)  | 11.18<br>(±4.41) | 12.73<br>(±3.27) | 13.42<br>(±2.22) |
| <b>LS513</b> | 1 | 9.33<br>(±1.74)  | 10.10<br>(±1.56) | 13.86<br>(±1.18) | 21.41<br>(±1.09) | 25.82<br>(±2.02) | 29.79<br>(±2.68) | 34.13<br>(±1.02) | 35.67<br>(±1.25) |
|              | 2 | 1.95<br>(±3.20)  | 2.72<br>(±3.21)  | 9.32<br>(±7.53)  | 24.96<br>(±8.82) | 40.58<br>(±8.53) | 51.32<br>(±7.54) | 56.55<br>(±5.97) | 61.44<br>(±5.41) |
|              | 3 | -2.17<br>(±0.72) | -2.04<br>(±2.72) | 4.79<br>(±4.04)  | 25.99<br>(±5.55) | 42.60<br>(±6.44) | 53.55<br>(±6.42) | 62.66<br>(±5.56) | 68.97<br>(±2.95) |

**Table S3.** Effect of combinatory treatment with OmeGo and 5-FU (3 days) on CRC cell lines (average % reduction in cell viability (±SD)). Numbers are based on raw data - blanc. These are the data plotted in manuscript Figure 3.

| Cell line     | Treatment     | 5-FU only        | OmeGo 300        | OmeGo 500         | OmeGo 700         |
|---------------|---------------|------------------|------------------|-------------------|-------------------|
| <b>DLD-1</b>  | OmeGo only    |                  | 12.40<br>(±5.59) | 33.22<br>(±9.39)  | 49.97<br>(±12.03) |
|               | 5-FU 1.2 µM   | 20.52<br>(±3.56) | 35.77<br>(±7.24) | 52.48<br>(±8.55)  | 66.95<br>(±6.21)  |
|               | 5-FU 2.4 µM   | 34.26<br>(±4.20) | 49.82<br>(±6.05) | 62.03<br>(±6.96)  | 71.02<br>(±6.36)  |
|               | 5-FU 4.8 µM   | 48.02<br>(±4.40) | 60.84<br>(±4.15) | 70.80<br>(±5.82)  | 79.12<br>(±3.86)  |
| <b>LS411N</b> | OmeGo only    |                  | 11.02<br>(±4.84) | 14.55<br>(±6.19)  | 17.25<br>(±6.34)  |
|               | 5-FU 1.2 µM   | 23.07<br>(±1.59) | 37.56<br>(±2.99) | 39.01<br>(±3.07)  | 39.90<br>(±3.92)  |
|               | 5-FU 2.4 µM   | 35.61<br>(±1.55) | 48.42<br>(±2.46) | 51.13<br>(±3.09)  | 52.40<br>(±2.83)  |
|               | 5-FU 4.8 µM   | 50.72<br>(±1.20) | 60.63<br>(±2.20) | 62.67<br>(±2.59)  | 63.36<br>(±2.78)  |
| <b>HCT-8</b>  | OmeGo only    |                  | -2.25<br>(±1.53) | 0.64<br>(±2.62)   | 0.69<br>(±1.79)   |
|               | 5-FU 1.2 µM   | 14.52<br>(±3.52) | 10.42<br>(±2.60) | 15.30<br>(±3.47)  | 16.43<br>(±4.48)  |
|               | 5-FU 2.4 µM   | 31.34<br>(±4.44) | 27.89<br>(±4.75) | 31.16<br>(±6.73)  | 35.54<br>(±7.51)  |
|               | 5-FU 4.8 µM   | 48.87<br>(±3.77) | 46.78<br>(±6.55) | 49.84<br>(±6.09)  | 49.45<br>(±6.90)  |
| <b>LS513</b>  | OmeGo only    |                  | 12.66<br>(±7.60) | 28.88<br>(±16.29) | 40.47<br>(±18.63) |
|               | 5-FU 0.125 µM | 7.09<br>(±1.29)  | 21.01<br>(±6.95) | 38.82<br>(±11.78) | 48.10<br>(±13.91) |
|               | 5-FU 0.250 µM | 22.24<br>(±1.74) | 35.77<br>(±3.06) | 45.73<br>(±4.30)  | 57.87<br>(±9.62)  |
|               | 5-FU 0.500 µM | 40.12<br>(±1.86) | 49.65<br>(±4.49) | 56.32<br>(±3.66)  | 63.75<br>(±5.76)  |

**Table S4.** Estimated effect of combinatory treatments of 5-FU and OmeGo in indicated concentrations. Values estimated by fitting the data to a linear model.

| Cell line | Treatment          | OmeGo 300 | OmeGo 500 | OmeGo 700 |
|-----------|--------------------|-----------|-----------|-----------|
| DLD-1     | 5-FU 1.2 $\mu$ M   | 36.49     | 47.97     | 59.44     |
|           | 5-FU 2.4 $\mu$ M   | 45.92     | 56.54     | 67.15     |
|           | 5-FU 4.8 $\mu$ M   | 64.79     | 73.67     | 82.56     |
| LS411N    | 5-FU 1.2 $\mu$ M   | 29.31     | 32.49     | 35.67     |
|           | 5-FU 2.4 $\mu$ M   | 39.63     | 43.53     | 47.43     |
|           | 5-FU 4.8 $\mu$ M   | 60.27     | 65.61     | 70.95     |
| HCT-8     | 5-FU 1.2 $\mu$ M   | 14.80     | 14.92     | 15.05     |
|           | 5-FU 2.4 $\mu$ M   | 26.83     | 27.13     | 27.42     |
|           | 5-FU 4.8 $\mu$ M   | 50.90     | 51.54     | 52.17     |
| LS513     | 5-FU 0.125 $\mu$ M | 25.47     | 36.53     | 47.58     |
|           | 5-FU 0.250 $\mu$ M | 34.24     | 43.77     | 53.30     |
|           | 5-FU 0.500 $\mu$ M | 51.78     | 58.26     | 64.74     |

**Table S5.** Concentration of DHA and EPA ( $\mu$ M) corresponding to OmeGo doses ( $\mu$ g/ml) used for combinatory treatment with 5-FU.

| Fatty acid         | OmeGo $\mu$ g/ml |       |       |
|--------------------|------------------|-------|-------|
|                    | 300              | 500   | 700   |
| EPA ( $\mu$ M)     | 28.6             | 47.6  | 66.6  |
| DHA ( $\mu$ M)     | 37.2             | 62.0  | 86.8  |
| Sum n-3 ( $\mu$ M) | 65.8             | 109.6 | 153.4 |

**Table S6.** Effect of combinatory treatment with DHA+EPA and 5-FU (3 days) on CRC cell lines (average % reduction in cell viability ( $\pm$ SD)). Numbers are based on raw data - blanc. These are the data plotted in manuscript Figure 4.

| Cell line | Treatment          | 5-FU only           | DHA+EPA 300          | DHA+EPA 500          | DHA+EPA 700          |
|-----------|--------------------|---------------------|----------------------|----------------------|----------------------|
| DLD-1     | DHA+EPA only       |                     | -4.60 ( $\pm$ 2.53)  | 58.59 ( $\pm$ 25.61) | 98.38 ( $\pm$ 1.28)  |
|           | 5-FU 1.2 $\mu$ M   | 20.39 ( $\pm$ 3.63) | 11.17 ( $\pm$ 5.17)  | 64.27 ( $\pm$ 22.67) | 97.82 ( $\pm$ 2.49)  |
|           | 5-FU 2.4 $\mu$ M   | 35.90 ( $\pm$ 4.59) | 27.75 ( $\pm$ 4.74)  | 69.89 ( $\pm$ 20.69) | 98.20 ( $\pm$ 1.33)  |
|           | 5-FU 4.8 $\mu$ M   | 49.89 ( $\pm$ 4.52) | 45.04 ( $\pm$ 5.64)  | 73.96 ( $\pm$ 15.89) | 98.56 ( $\pm$ 0.98)  |
| LS411N    | DHA+EPA only       |                     | 7.66 ( $\pm$ 6.59)   | 40.35 ( $\pm$ 8.70)  | 88.32 ( $\pm$ 8.85)  |
|           | 5-FU 1.2 $\mu$ M   | 22.15 ( $\pm$ 2.62) | 31.71 ( $\pm$ 3.95)  | 48.92 ( $\pm$ 5.75)  | 86.73 ( $\pm$ 10.49) |
|           | 5-FU 2.4 $\mu$ M   | 34.82 ( $\pm$ 3.24) | 40.35 ( $\pm$ 1.89)  | 52.38 ( $\pm$ 3.94)  | 84.60 ( $\pm$ 9.59)  |
|           | 5-FU 4.8 $\mu$ M   | 49.44 ( $\pm$ 2.26) | 52.11 ( $\pm$ 3.24)  | 59.12 ( $\pm$ 4.54)  | 88.47 ( $\pm$ 7.53)  |
| HCT-8     | DHA+EPA only       |                     | -11.62 ( $\pm$ 5.22) | -8.26 ( $\pm$ 3.74)  | 76.41 ( $\pm$ 23.71) |
|           | 5-FU 1.2 $\mu$ M   | 14.72 ( $\pm$ 3.03) | -4.02 ( $\pm$ 2.57)  | -0.34 ( $\pm$ 3.88)  | 74.75 ( $\pm$ 26.71) |
|           | 5-FU 2.4 $\mu$ M   | 30.03 ( $\pm$ 4.25) | 8.64 ( $\pm$ 3.32)   | 16.03 ( $\pm$ 9.66)  | 78.59 ( $\pm$ 23.42) |
|           | 5-FU 4.8 $\mu$ M   | 49.22 ( $\pm$ 3.08) | 29.48 ( $\pm$ 5.72)  | 30.12 ( $\pm$ 9.22)  | 83.47 ( $\pm$ 19.11) |
| LS513     | DHA+EPA only       |                     | -28.76 ( $\pm$ 2.11) | 17.15 ( $\pm$ 17.35) | 89.91 ( $\pm$ 7.81)  |
|           | 5-FU 0.125 $\mu$ M | 8.93 ( $\pm$ 2.22)  | -9.42 ( $\pm$ 2.14)  | 32.37 ( $\pm$ 14.36) | 91.62 ( $\pm$ 5.90)  |
|           | 5-FU 0.250 $\mu$ M | 25.23 ( $\pm$ 2.32) | 14.87 ( $\pm$ 3.23)  | 46.34 ( $\pm$ 11.34) | 92.09 ( $\pm$ 7.01)  |
|           | 5-FU 0.500 $\mu$ M | 41.64 ( $\pm$ 3.80) | 37.57 ( $\pm$ 7.29)  | 56.12 ( $\pm$ 8.05)  | 93.22 ( $\pm$ 4.54)  |

**Table S7.** Estimated effect of combinatory treatments of 5-FU and DHA+EPA in indicated concentrations (for DHA+EPA the OmeGo correlated concentrations were used). Values estimated by fitting the data to a linear model.

| Cell line | Treatment        | DHA+EPA 300 | DHA+EPA 500 | DHA+EPA 700 |
|-----------|------------------|-------------|-------------|-------------|
| DLD-1     | 5-FU 1.2 $\mu$ M | 39.40       | 62.95       | 86.50       |
|           | 5-FU 2.4 $\mu$ M | 48.29       | 67.81       | 87.33       |
|           | 5-FU 4.8 $\mu$ M | 66.08       | 77.53       | 88.98       |
| LS411N    | 5-FU 1.2 $\mu$ M | 38.66       | 56.50       | 74.34       |
|           | 5-FU 2.4 $\mu$ M | 46.51       | 60.99       | 75.47       |
|           | 5-FU 4.8 $\mu$ M | 62.20       | 69.96       | 77.72       |
| HCT-8     | 5-FU 1.2 $\mu$ M | 17.83       | 32.22       | 46.61       |
|           | 5-FU 2.4 $\mu$ M | 28.84       | 39.55       | 50.27       |
|           | 5-FU 4.8 $\mu$ M | 50.85       | 54.22       | 57.59       |

|              |                    |       |       |       |
|--------------|--------------------|-------|-------|-------|
| <b>LS513</b> | 5-FU 0.125 $\mu$ M | 20.90 | 44.68 | 68.45 |
|              | 5-FU 0.250 $\mu$ M | 33.26 | 51.70 | 72.15 |
|              | 5-FU 0.500 $\mu$ M | 57.97 | 68.76 | 79.55 |

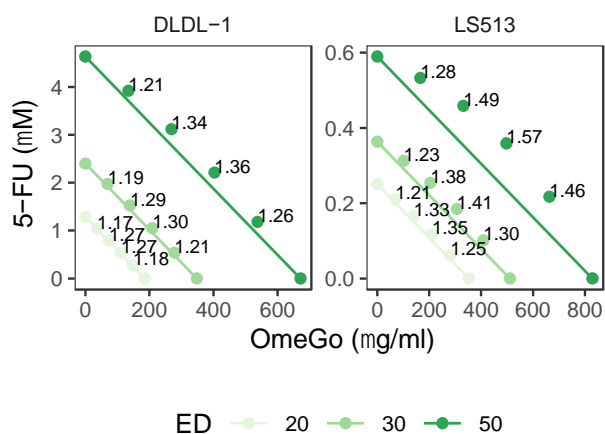

**Figure S1.** Combination results from 5-FU and OmeGo treatment of DLD-1 and LS513 cells. For each cell line, the corresponding drug combination linear model was used to create OmeGo and 5-FU combination values for selected effective doses. Values are computed Chou-Talalay combination indices for selected drug combination values.

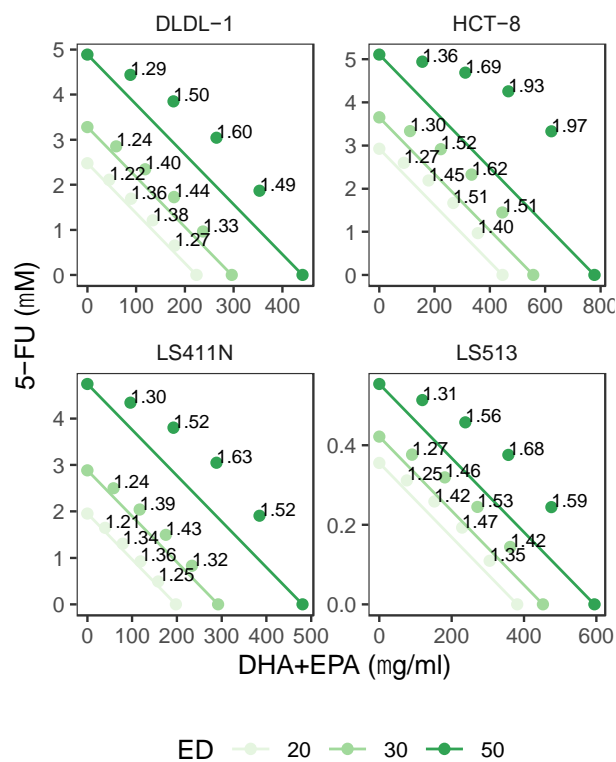

**Figure S2.** Combination results from 5-FU and DHA+EPA treatment of DLD-1, LS411N, HCT-8, and LS513 cells. See Figure S1 for details.
